# Supplementary material
Source: ML conference proceedings conference paper supplement (https://aclanthology.org/D17-1206)
Supplement: Attachment [file D17-1206.Attachment.zip]

Archive with 1 entries (1 files):
- supplemental/supplemental.pdf
